# Supplementary material
Source: ML conference proceedings conference paper supplement (https://openreview.net/forum?id=qQph6GscZZ)
Supplement: supplementary_material [file attachment]

# Supplementary Materials: Improved Weighted Tensor Schatten $p$ -Norm for Fast Multi-view Graph Clustering

Anonymous reviewers

## 1 SUMMARY

In this supplementary material, we provide additional information. Concretely, we mainly supplement "Complexity analysis of competitors" in Section 2.1, "Proofs of **Theorem 1** and **Theorem 2**" in Section 2.2, and "Parameter Analysis and Convergence" in Section 2.3, respectively. The codes and benchmark dataset for this paper are also provided for repetition.

## 2 CONTENT

### 2.1 Complexity Analysis

As shown in Table 1, both space complexity and time complexity are linear to  $n$ , which enables handling large-scale datasets with 100,000  $\leq n$ .

Table 1: Complexity analysis.

| Method       | Space Complexity $\approx$ | Time Complexity $\approx$ |
|--------------|----------------------------|---------------------------|
| Our method   | $O(n)$                     | $O(n)$                    |
| TBGL [13]    | $O(n)$                     | $O(n)$                    |
| MVBGC [5]    | $O(n)$                     | $O(n)$                    |
| FastMICE [2] | $O(n)$                     | $O(n)$                    |
| UDBGL [1]    | $O(n)$                     | $O(n)$                    |
| SDAFG [9]    | $O(n)$                     | $O(n)$                    |
| FPMVS [12]   | $O(n)$                     | $O(n)$                    |
| FMCNOF [16]  | $O(n)$                     | $O(n)$                    |
| SFMC [7]     | $O(n)$                     | $O(n)$                    |
| SMVSC [11]   | $O(n)$                     | $O(n)$                    |
| LMVSC [4]    | $O(n)$                     | $O(n)$                    |
| BMVC [17]    | $O(n)$                     | $O(n)$                    |
| PMSC [3]     | $O(n^2)$                   | $O(n^3)$                  |
| FMR [6]      | $O(n^2)$                   | $O(n^3)$                  |
| AMGL [10]    | $O(n^2)$                   | $O(n^3)$                  |

### 2.2 Optimization

$$\min_{\mathbf{B}^r, \mathbf{W}^r, \mathbf{A}^r, \mathcal{J}} \gamma \sum_{r=1}^v \sum_{i=1}^m \sum_{j=1}^n \|\mathbf{b}_i^r - (\mathbf{W}^r)^\top \mathbf{x}_j^r\|_F^2 a_{ij}^r + \alpha \|\mathbf{A}^r\|_F^2 + \|\mathcal{A}\|_{\mathbb{L}\omega, S_p} \quad (1)$$

$$\text{s.t. } (\mathbf{A}^r)^\top \mathbf{1} = \mathbf{1}, \mathbf{A}^r \geq 0, (\mathbf{W}^r)^\top \mathbf{W}^r = \mathbf{I}_m, (\mathbf{B}^r)^\top \mathbf{B}^r = \mathbf{I}_m$$

To solve Eq. (1), the auxiliary variable  $\mathcal{K}$  is introduced to make Eq. (1) separable. Then, Eq. (1) is rewritten as the following augmented Lagrangian function

$$\min_{\mathbf{B}^r, \mathbf{W}^r, \mathbf{A}^r, \mathcal{J}, \mathcal{K}} \gamma \sum_{r=1}^v \sum_{i=1}^m \sum_{j=1}^n \|\mathbf{b}_i^r - (\mathbf{W}^r)^\top \mathbf{x}_j^r\|_F^2 a_{ij}^r + \alpha \|\mathbf{A}^r\|_F^2 + \|\mathcal{K}\|_{\mathbb{L}\omega, S_p} + \frac{\mu}{2} \|\mathcal{J} - \mathcal{K} + \frac{\mathcal{Y}}{\mu}\|_F^2 \quad (2)$$

$$\text{s.t. } \mathbf{A}^r \geq 0, (\mathbf{A}^r)^\top \mathbf{1} = \mathbf{1}, (\mathbf{W}^r)^\top \mathbf{W}^r = \mathbf{I}_m, (\mathbf{B}^r)^\top \mathbf{B}^r = \mathbf{I}_m, \mathcal{J} = \Psi(\mathbf{A}^1, \mathbf{A}^r, \dots, \mathbf{A}^v), \mathcal{J} = \mathcal{K}$$

Eq. (4) could be separately solved by developing an alternating iterative algorithm as follows.

▷ **Step-1: Solving  $\mathbf{A}^r$  with  $\mathbf{B}$ ,  $\mathbf{W}$ ,  $\mathbf{A}^b$ , and  $\mathcal{K}$  fixed.** Then,  $\mathbf{A}^r$ -subproblem of Eq. (4) changes to

$$\min_{a_{ij}^r \geq 0, (\mathbf{a}^r)^\top \mathbf{1} = \mathbf{1}} \gamma \sum_{r=1}^v \sum_{i=1}^m \sum_{j=1}^n \|\mathbf{b}_i^r - (\mathbf{W}^r)^\top \mathbf{x}_j^r\|_F^2 a_{ij}^r + \alpha \|\mathbf{A}^r\|_F^2 + \frac{\mu}{2} \|\mathbf{A}^r - \mathbf{K}^r + \frac{\mathbf{Y}^r}{\mu}\|_F^2 \quad (3)$$

Denote  $\|\mathbf{b}_i^r - (\mathbf{W}^r)^\top \mathbf{x}_j^r\|_F^2 = d_{ij}^r$ , with elimination of irrelevant variables for  $r$ -th view, Eq. (3) becomes to the following problem

$$\min_{a_{ij}^r \geq 0, (\mathbf{a}^r)^\top \mathbf{1} = \mathbf{1}} \sum_{i=1}^m \sum_{j=1}^n \alpha (a_{ij}^r)^2 + \frac{\mu}{2} (a_{ij}^r)^2 - 2 \left[ \frac{1}{2} \mu f_{ij}^r - \frac{1}{2} \gamma d_{ij}^r \right] a_{ij}^r$$

$$\Leftrightarrow \min_{a_{ij}^r \geq 0, (\mathbf{a}^r)^\top \mathbf{1} = \mathbf{1}} \sum_{i=1}^m \sum_{j=1}^n (a_{ij}^r)^2 - 2 \frac{[\frac{1}{2} \mu f_{ij}^r - \frac{1}{2} \gamma d_{ij}^r]}{(\alpha + \frac{\mu}{2})} a_{ij}^r$$

$$\Leftrightarrow \min_{a_{ij}^r \geq 0, (\mathbf{a}^r)^\top \mathbf{1} = \mathbf{1}} \|\mathbf{a}^r\|_F^2 - 2 \frac{[\frac{1}{2} \mu \mathbf{f}^r - \frac{1}{2} \gamma \mathbf{d}^r]}{(\alpha + \frac{\mu}{2})} \|\mathbf{a}^r\|_F^2 \quad (4)$$

where  $f_{ij}^r$  is element of  $\mathbf{F}^r = \mathbf{T}^r - \frac{\mathbf{Y}^r}{\mu}$ , respectively. Then, updating  $\mathbf{a}^r$  converts to the following column form

$$\min_{\mathbf{a}_j} \|\mathbf{a}_j - \hat{\mathbf{a}}_j\|_F^2, \text{ s.t. } \forall i, \mathbf{a}_j^\top \mathbf{1} = 1, \mathbf{a}_j \geq 0 \quad (5)$$

where  $\hat{\mathbf{a}}_j = \frac{\frac{1}{2} \mu \mathbf{f}_j^r - \frac{1}{2} \gamma \mathbf{d}_j^r}{(\alpha + \mu)}$ . Each column  $\mathbf{a}_j$  could be optimized via the following **Theorem 1**.

**Theorem 1.** Given arbitrary  $v$  vectors  $\{\hat{\mathbf{a}}_j\}_{j=1}^v$ , we obtain the following closed-form solution  $\mathbf{a}_j^*$

$$\mathbf{a}_j^* = \arg \min_{\mathbf{a}_j} \|\mathbf{a}_j - \hat{\mathbf{a}}_j\|_F^2, \text{ s.t. } \mathbf{a}_j^\top \mathbf{1} = 1, \mathbf{a}_j \geq 0 \quad (6)$$

**Proof.** For ease of presentation, we first substitute  $\mathbf{a}_j$  and  $\hat{\mathbf{a}}_j$  to the vectors  $\mathbf{a}$  and  $\mathbf{g}$ , respectively. Then, by denoting the Lagrange multipliers  $\varphi$  and  $\mathbf{e}$  for the constraints  $\mathbf{a}^\top \mathbf{1} = 1$  and  $\mathbf{a}_j \geq 0$ , respectively, the Lagrangian function of Eq. (6) is rewritten as

$$\mathcal{L}(\mathbf{a}, \varphi, \mathbf{e}) = \frac{1}{2} \|\mathbf{a} + \mathbf{g}\|_2^2 - \varphi (\mathbf{a}^\top \mathbf{1} - 1) - \mathbf{e}^\top \mathbf{a}. \quad (7)$$

Unpublished working draft. Not for distribution.

Permission to make digital or hard copies of all or part of this work for personal or professional use, not for redistribution, is granted by ACM Publishing Department for profit or commercial advantage and that copies bear this notice and the full citation on the first page. Copyrights for components of this work owned by others than the author(s) must be honored. Abstracting with credit is permitted. To copy otherwise, or republish, to post on servers or to redistribute to lists, requires prior specific permission and/or a fee. Request permissions from permissions@acm.org.

ACM MM, 2024, Melbourne, Australia

© 2024 Copyright held by the owner/author(s). Publication rights licensed to ACM.

ACM ISBN 978-x-xxxx-xxxx-x/YY/MM

https://doi.org/10.1145/nnnnnnnn.nnnnnnnn

We suppose that the optimal solutions of  $\mathbf{a}$ ,  $\varphi$ , and  $\mathbf{e}$  in (27) are  $\mathbf{a}^*$ ,  $\varphi^*$ , and  $\mathbf{e}^*$ , respectively. According to KKT condition, we have the following equation:

$$\begin{cases} \forall j, & a_{ij}^* + g_j - \varphi^* - e_j^* = 0 \\ \forall j, & a_{ij}^* e_j^* = 0 \\ \forall j, & a_{ij}^* \geq 0 \\ \forall j, & e_j^* \geq 0, \end{cases} \quad (8)$$

Writing the first term of Eq.(28) in a vector form as  $\mathbf{a}^* + \mathbf{g} - \varphi^* \mathbf{1} - \mathbf{e}^* = 0$ . Considering the constraint  $\mathbf{a}^T \mathbf{1} = 1$ , we derive  $\varphi^* = \frac{\mathbf{1}^T \mathbf{g} - \mathbf{1}^T \mathbf{e}^*}{n}$  since  $\mathbf{g}^T \mathbf{1} = \mathbf{1}^T \mathbf{g}$  and  $(\mathbf{e}^*)^T \mathbf{1} = \mathbf{1}^T \mathbf{e}^*$ . Thus, the optimal solution  $\mathbf{a}^*$  can be solved by

$$\mathbf{a}^* = \frac{1}{n} (\mathbf{1} - \mathbf{1}^T \mathbf{e}^*) \mathbf{1} - \mathbf{g} - \frac{1}{n} \mathbf{1}^T \mathbf{g} \mathbf{1} + \mathbf{e}^*, \quad (9)$$

and its scalar form becomes

$$a_{ij}^* = \frac{1}{n} - \frac{\mathbf{1}^T \mathbf{e}^*}{n} - g_j + \frac{1}{n} \mathbf{1}^T \mathbf{g} + e_j^*. \quad (10)$$

Denote  $\hat{e}^* = \frac{\mathbf{1}^T \mathbf{e}^*}{n}$  and  $\hat{g}_j = \frac{1}{n} - g_j + \frac{1}{n} \mathbf{1}^T \mathbf{g}$ , then  $a_{ij}^*$  becomes

$$a_{ij}^* = \hat{g}_j + e_j^* - \hat{e}^*, \quad \forall j \quad (11)$$

According to the 2-4 terms of Eq.(28) and Eq.(31), we have  $a_{ij}^* = [\hat{g}_j - \hat{e}^*]_+$ , where  $[\hat{g}_j - \hat{e}^*]_+ = \max(0, \hat{g}_j - \hat{e}^*)$ . Namely, if the optimal solution  $\mathbf{e}^*$  is known, we can gain the corresponding optimal solution  $a_{ij}^*$ . We gain  $e_j^* = \hat{e}^* + a_{ij}^* - \hat{g}_j$  due to Eq.(31) and  $e_j^* = [\hat{e}^* - \hat{g}_j]_+$  according to the 2-4 terms of Eq.(28). Note that we have denoted  $\hat{e}^* = \frac{\mathbf{1}^T \mathbf{e}^*}{n}$ , thus we gain the optimal solution of  $\hat{e}^*$  as

$$\hat{e}^* = \frac{1}{n} \sum_{j=1}^n [\hat{e}^* - \hat{g}_j]_+. \quad (12)$$

So far, the Newton method can be employed to obtain the optimal solution  $\hat{e}^*$  by defining a cost function as

$$\Psi(\hat{e}) = \frac{1}{n} \sum_{j=1}^n [\hat{e} - \hat{g}_j]_+ - \hat{e}. \quad (13)$$

where  $\Psi$  denotes the functional symbol. When the root searching problem of  $\Psi(\hat{e}) = 0$  is solved, the optimal  $\hat{e}^*$  will be obtained. Since  $\hat{e} \geq 0$ ,  $\Psi'(\hat{e}^t) \leq 0$ , and  $\Psi'(\hat{e}^t) \leq 0$  is a piecewise linear and convex function, the Newton method can be used to obtain the root of  $\Psi(\hat{e}) = 0$  via

$$\hat{e}^{t+1} = \hat{e}^t - \Psi(\hat{e}^t) \cdot \left[ \frac{\partial \Psi(\hat{e}^t)}{\partial \hat{e}^t} \right]^{-1} \quad (14)$$

where  $\Psi'(\hat{e}^t) = \frac{\partial \Psi(\hat{e}^t)}{\partial \hat{e}^t}$  is first-order derivative of  $\Psi(\hat{e}^t)$ .  $\square$

**Update-2: Solving  $\mathbf{W}$  with  $\mathbf{A}$ ,  $\mathbf{B}$ , and  $\mathbf{W}$  fixed.** In this case,  $\mathbf{W}$ -subproblem of Eq. (4) can be written as

$$\max_{\mathbf{W}^r} \text{Tr}((\mathbf{W}^r)^T \mathbf{E}^r) \text{ s.t. } \mathbf{W}^r (\mathbf{W}^r)^T = \mathbf{I}_k, \quad (15)$$

where  $\mathbf{E}^r = \mathbf{X}^r (\mathbf{A}^r)^T (\mathbf{B}^r)^T$ . Eq. (15) can be solved via the Singular Value Decomposition (SVD) **Theorem 2** with complexity  $\mathcal{O}(v\hat{d}(nm + k^2 + km))$  for each iteration, where  $\hat{d} = \sum_{p=1}^v d^r$ .

**Theorem 2.** Letting the SVD of  $\mathbf{E} \in \mathbb{R}^{d \times l}$  be  $\mathbf{E} = \mathbf{UGV}^T$ , where  $\mathbf{U} \in \mathbb{R}^{d \times l}$ ,  $\mathbf{G} \in \mathbb{R}^{l \times l}$  and  $\mathbf{V} \in \mathbb{R}^{l \times l}$ , the optimal solution of  $\max_{\mathbf{W}^T \mathbf{W} = \mathbf{I}} \text{Tr}(\mathbf{W}^T \mathbf{E})$  is  $\mathbf{W} = \mathbf{UV}^T$ .

**Proof.** Letting  $\mathbf{E} = \mathbf{UGV}^T \in \mathbb{R}^{d \times l}$  and according to the rotation invariance of trace norm,  $\text{Tr}(\mathbf{W}^T \mathbf{E})$  converts to

$$\text{Tr}(\mathbf{W}^T \mathbf{E}) = \text{Tr}(\mathbf{W}^T \mathbf{UGV}^T) = \text{Tr}(\mathbf{GV}^T \mathbf{W}^T \mathbf{U}) \quad (16)$$

Denote  $\mathbf{D} = \mathbf{V}^T \mathbf{W}^T \mathbf{U}$ , we have  $\text{Tr}(\mathbf{W}^T \mathbf{E}) = \text{Tr}(\mathbf{GD})$ , where  $\mathbf{G}$  and  $\mathbf{D}$  denote their  $i$ -th diagonal elements as  $g_{ii}$  and  $d_{ii}$ , respectively. Considering  $\mathbf{DD}^T = \mathbf{I}$ , we have  $|d_{ii}| \leq 1$ . Further, the singular value  $g_{ii}$  should enjoy  $g_{ii} \geq 0$ . So far, we could deduce

$$\text{Tr}(\mathbf{W}^T \mathbf{E}) = \text{Tr}(\mathbf{GD}) = \sum_{i=1}^k g_{ii} d_{ii} \leq \sum_{i=1}^b g_{ii} \quad (17)$$

Based on inequality Eq.(17), the maximization of  $\text{Tr}(\mathbf{W}^T \mathbf{E})$  could be reached when  $d_{ii} = 1$ . This further deduces  $\mathbf{W} = \mathbf{U}[\mathbf{I}_d; 0]\mathbf{V}^T$ , where  $\mathbf{D} = [\mathbf{I}_d; 0] \in \mathbb{R}^{l \times d}$  and  $\mathbf{D} = \mathbf{V}^T \mathbf{W}^T \mathbf{U}$ . According to the above analysis, the optimal solution of  $\max_{\mathbf{W}^T \mathbf{W} = \mathbf{I}} \text{Tr}(\mathbf{W}^T \mathbf{E})$  is  $\mathbf{W} = \mathbf{UV}^T$  by performing the tiny SVD on  $\mathbf{E}$ .  $\square$

**Step-3 update  $\mathbf{B}^r$ :** Optimizing  $\mathbf{B}^r$  with the irrelevant variables fixed is equivalent to the following optimization problem

$$\max_{\mathbf{B}^r} \text{Tr}((\mathbf{B}^r)^T \mathbf{C}^r) \text{ s.t. } (\mathbf{B}^r)^T \mathbf{B}^r = \mathbf{I}_m \quad (18)$$

where  $\mathbf{C}^r = \gamma(\mathbf{W}^r)^T \mathbf{X}^r (\mathbf{A}^r)^T$ . The optimal solution of optimizing  $\mathbf{B}^r$  can be effectively obtained via **Theorem 2**.

**Step-4 update  $\mathcal{K}$ :** Ignoring the irrelevant items w.r.t.  $\mathcal{K}$ , updating  $\mathcal{K}$  subproblem is

$$\min_{\mathcal{K}} \|\mathcal{K}\|_{\omega, S_p}^p + \frac{\mu}{2} \|\mathcal{K} - (\mathcal{J} + \frac{\mathcal{Y}}{\mu})\|_F^2 \quad (19)$$

According to [8], Eq. (21) can be solved into two steps as follows: (1) minimizing the core matrix, and (2) minimizing  $t$ -TSN.

(1) Updating core matrix as

$$\min_{\mathfrak{P}(\mathcal{T})} \|\mathfrak{P}(\mathcal{T})\|_* + \frac{1}{2\lambda} \|\mathcal{F} - (\mathcal{J} + \frac{\mathcal{Y}}{\mu})\|_F^2 \quad (20)$$

where regularization parameter  $\lambda = 1/(\max(m, v)n)^{\frac{1}{2}}$ . And the tensor  $\mathcal{T}$  is obtained from  $t$ -SVD on the temporary variable  $\mathcal{F}$ , i.e.,  $\mathcal{F} = \mathcal{U} * \mathcal{T} * \mathcal{V}$ .

(2) Updating  $\mathcal{K}$  as

$$\min_{\mathcal{K}} \|\mathcal{K}\|_{\omega, S_p}^p + \frac{\mu}{2} \|\mathcal{K} - \mathcal{L}\|_F^2 \quad (21)$$

With the learned low-rank core matrix  $\mathfrak{P}(\mathcal{T})$ , we can use  $t$ -product to reconstruct a tensor as  $\mathcal{L} = \mathcal{U} * \mathfrak{P}(\mathcal{T})^{-1} * \mathcal{V}$ . The learned  $\mathcal{L}$  can further produce a closed-form solution via the following **Theorem 3**.

**Theorem 3.** Consider  $\mathcal{L} \in \mathbb{R}^{n_1 \times n_2 \times n_3}$ , with  $r = \min(n_1, n_2)$ . Let  $\mathcal{L}_f = \mathcal{U}_f \mathcal{M}_f \mathcal{V}_f^T$ , then the optimization problem for weight tensor Schatten  $p$ -norm can be formulated as

$$\min_{\mathcal{K}} \eta \|\mathcal{K}\|_{\omega, S_p}^p + \frac{1}{2} \|\mathcal{K} - \mathcal{L}\|_F^2 \quad (22)$$

and its optimal solution is

$$\mathcal{K}^* = \text{ifft}(\mathcal{U}_f * \mathcal{D}_{\eta, \omega, p}(\mathcal{L}_f) * \mathcal{V}_f^T) \quad (23)$$

where  $\mathcal{M}_f^k = \text{diag}(\delta(\mathcal{M}_f^k))$  and  $\mathcal{D}_{\eta, \omega, p}(\mathcal{L}_f) = \text{diag}(\theta(\mathcal{L}_f^k))$  are the  $k$ -th frontal slices of  $\mathcal{M}_f$  and  $\mathcal{D}_{\eta, \omega, p}(\mathcal{L}_f)$  in the Fourier domain with respect to  $\theta(\mathcal{L}_f^k) = \text{GST}(\delta(\mathcal{M}_f^k), \eta * \omega^k, p)$ .

**Proof:** Eq. (22) becomes to

$$\min_{\mathcal{K}_f} \sum_{l=1}^{n_3} \left( \sum_{j=1}^r \eta * \omega_j^k * \theta_j^r(\mathbf{K}_f^k) \right) + \frac{1}{2} \|\mathbf{K}_f^k - \mathbf{L}_f^k\|_F^2 \quad (24)$$

in which  $\theta_j(\mathbf{K}_f^k)$  denotes the  $j$ -th singular value of  $\mathbf{K}_f^k$ , and its corresponding weight is  $\omega_j^k = \frac{1}{\theta_j^r(\mathbf{K}_f^k) + \epsilon}$ . Initially, each weight  $\omega_j^k$  is set as  $\omega_j^k = \frac{1}{\delta_j(\mathbf{M}_f^k) + \epsilon}$  since  $\theta_j^r(\mathbf{K}_f^k)$  is unavailable in the first iteration, and updated based on the previous iteration of  $\theta_j^r(\mathbf{K}_f^k)$ .

Eq. (24) can be solved separately for different  $k$  as

$$\min_{\mathbf{K}_f^k} \sum_{j=1}^r \eta * \omega_j^k * \theta_j^r(\mathbf{K}_f^k) + \frac{1}{2} \|\mathbf{K}_f^k - \mathbf{L}_f^k\|_F^2 \quad (25)$$

The solvers are derived using the following **Theorem 4** and **Lemma 1**.

**Theorem 4.** Consider the singular value decomposition (SVD) of matrix  $\mathbf{T} \in \mathbb{R}^{n_1 \times n_2}$  as  $\mathbf{T} = \mathbf{U}_A \mathbf{D}_A \mathbf{V}_A^T$ , where  $\eta > 0, r = \min(n_1, n_2)$ , and  $0 \leq \omega_1 \leq \omega_2 \leq \dots \leq \omega_r$ . The global optimal solution for the following weighted Schatten  $p$ -norm minimization problem, adapted from [14], is as follows:

$$\min_{\mathbf{K}} \eta \|\mathbf{K}\|_{\omega, s_p}^p + \frac{1}{2} \|\mathbf{K} - \mathbf{T}\|_F^2 \quad (26)$$

As shown in [15], the optimal solution of Eq. (26) is given by

$$\mathbf{K}^* = \mathbf{U}_A \mathbf{D}_{\eta, \omega, p}(\mathbf{T}) \mathbf{V}_A^T \quad (27)$$

where  $\mathbf{D}_A = \text{diag}(\boldsymbol{\delta})$ ,  $\mathbf{D}_{\eta, \omega, p}(\mathbf{T}) = \text{diag}(\boldsymbol{\theta})$ . The vector  $\boldsymbol{\delta} = \delta_j(\mathbf{T})_j = 1^r$  represents the singular values of  $\mathbf{T}$ , each of which can be obtained using **Lemma 1** [18].

**Lemma 1.** Consider the  $k$ -th subproblem of Eq. (26), expressed as

$$\min_{\theta(\mathbf{K}_f^k) \geq 0} f(\theta_j(\mathbf{K}_f^k)) = \frac{1}{2} (\theta_j(\mathbf{K}_f^k) - \delta_j(\mathbf{L}_f^k))^2 + \eta \omega_j \theta_j(\mathbf{K}_f^k)^p \quad (28)$$

Within  $\omega$  and  $p$ , the soft-thresholding function  $\eta p^{GST}(\omega_j)$  is defined as

$$\eta p^{GST}(\omega_j) = (2\omega_j(1-p))^{\frac{1}{2-p}} + \omega_j p (2\omega_j(1-p))^{\frac{p-1}{2-p}} \quad (29)$$

The minimum  $\text{Su}^{GST}(\delta_j, \omega_j)$  of Eq. (29) is determined by

$$T_p^{GST}(\delta_j, \omega_j) = \begin{cases} 0, & \delta_j < \eta p^{GST}(\omega_j) \\ \text{sgn}(\delta_j) S_p^{GST}(\delta_j, \omega_j), & \delta_j \geq \eta p^{GST}(\omega_j) \end{cases} \quad (30)$$

in which  $S_p^{GST}(\delta_j, \omega_j)$  satisfies

$$S_p^{GST}(\delta_j, \omega_j) - \delta_j + \omega_j p \left( S_p^{GST}(\delta_j, \omega_j) \right)^{p-1} = 0 \quad (31)$$

Arranging  $\boldsymbol{\omega}$  ( $0 \leq \omega_1 \leq \omega_2 \leq \dots \leq \omega_r$ ) in non-ascending order and  $\boldsymbol{\delta}$  ( $\delta_1 \geq \delta_2 \geq \dots \geq \delta_r \geq 0$ ) in non-descending order aids in determining a global minimizer  $\boldsymbol{\theta}$  ( $\theta_1 \geq \theta_2 \geq \dots \geq \theta_r$ ) using von Neumann's trace inequality, where  $r = \min(n_1, n_2)$ .

Updating ADMM variables are written as

$$\begin{aligned} \mathcal{Y} &= \mathcal{Y} + \mu(\mathcal{J} - \mathcal{K}) \\ \mu &= \min(\rho\mu, \mu_{\max}) \end{aligned} \quad (32)$$

In the optimization process, we set  $\mu = 1e^{-4}$  and  $\mu_{\max} = 10^{10}$ , with a computational complexity of  $\mathcal{O}(n)$ . Algorithm 1 delineates the entire optimization procedure of Eq. (4), wherein convergence

is assessed by evaluating the objective value  $obj^t$  after the  $t$ -th iteration.

---

#### Algorithm 1 IWTSN-FMGC

---

**Input:** Multi-view data  $\{\mathbf{X}^r\}_{r=1}^v$ , cluster number  $c$ , latent space dimension  $k$ , and parameters  $\alpha, \gamma$ .  
Initialize  $\mathbf{Q}^r = \mathbf{I}_k$ , and the others matrices as  $\mathbf{0}$ .

- 1: **repeat**
- 2:   Update  $\mathbf{A}, \mathbf{W}, \mathbf{B}$ , and  $\mathcal{K}$  via Eq. (3), Eq. (15), Eq. (18), and Eq. (19), respectively;
- 3:   Update ADMM variables via Eq. (32);
- 4: **until** Satisfy  $(obj^{(t)} - obj^{(t-1)})/obj^{(t)} \leq 1e - 4$ .
- 5: Perform SVD on  $\hat{\mathbf{A}} = \sum_{r=1}^v \mathbf{A}^r / v$ .

**Output:** Clustering metrics.

---

### 2.3 Parameter and Convergence

More parameters and convergence analyses are provide in Fig. 1 and Fig. 2.

### REFERENCES

- [1] Si-Guo Fang, Dong Huang, Xiao-Sha Cai, Chang-Dong Wang, Chaobo He, and Yong Tang. 2023. Efficient multi-view clustering via unified and discrete bipartite graph learning. *IEEE Transactions on Neural Networks and Learning Systems* (2023), 1–12.
- [2] Dong Huang, Chang-Dong Wang, and Jian-Huang Lai. 2023. Fast multi-view clustering via ensembles: Towards scalability, superiority, and simplicity. *IEEE Transactions on Knowledge and Data Engineering* (2023).
- [3] Zhao Kang, Xinxia Zhao, Chong Peng, Hongyuan Zhu, Joey Tianyi Zhou, Xi Peng, Wenyu Chen, and Zenglin Xu. 2020. Partition level multiview subspace clustering. *Neural Networks* 122 (2020), 279–288.
- [4] Zhao Kang, Wangtao Zhou, Zhitong Zhao, Junming Shao, Meng Han, and Zenglin Xu. 2020. Large-scale multi-view subspace clustering in linear time. In *Proceedings of the AAAI Conference on Artificial Intelligence*, Vol. 34. 4412–4419.
- [5] Liang Li, Junpu Zhang, Siwei Wang, Xinwang Liu, Kenli Li, and Keqin Li. 2023. Multi-view bipartite graph clustering with coupled noisy feature filter. *IEEE Transactions on Knowledge and Data Engineering* (2023), 1–12.
- [6] Ruihuang Li, Changqing Zhang, Qinghua Hu, Pengfei Zhu, and Zheng Wang. 2019. Flexible Multi-View Representation Learning for Subspace Clustering.. In *IJCAI*. 2916–2922.
- [7] Xuelong Li, Han Zhang, Rong Wang, and Feiping Nie. 2022. Multiview clustering: A scalable and parameter-free bipartite graph fusion method. *IEEE Transactions on Pattern Analysis and Machine Intelligence* 44, 1 (2022), 330–344.
- [8] Canyi Lu, Jiashi Feng, Yudong Chen, Wei Liu, Zhouchen Lin, and Shuicheng Yan. 2019. Tensor robust principal component analysis with a new tensor nuclear norm. *IEEE transactions on pattern analysis and machine intelligence* 42, 4 (2019), 925–938.
- [9] Xun Lu and Songhe Feng. 2023. Structure diversity-induced anchor graph fusion for multi-view clustering. *ACM Transactions on Knowledge Discovery from Data* 17, 2 (2023), 1–18.
- [10] Feiping Nie, Xiaoqian Wang, Michael I Jordan, and Heng Huang. 2016. The constrained laplacian rank algorithm for graph-based clustering. In *Thirtieth AAAI Conference on Artificial Intelligence*. 1969–1976.
- [11] Mengjing Sun, Pei Zhang, Siwei Wang, Sihang Zhou, Wenxuan Tu, Xinwang Liu, En Zhu, and Changjian Wang. 2021. Scalable multi-view subspace clustering with unified anchors. In *Proceedings of the 29th ACM International Conference on Multimedia*. 3528–3536.
- [12] Siwei Wang, Xinwang Liu, Xinzhong Zhu, Pei Zhang, Yi Zhang, Feng Gao, and En Zhu. 2021. Fast parameter-free multi-view subspace clustering with consensus anchor guidance. *IEEE Transactions on Image Processing* 31 (2021), 556–568.
- [13] Wei Xia, Quanxue Gao, Qianqian Wang, Xinbo Gao, Chris Ding, and Dacheng Tao. 2023. Tensorized Bipartite Graph Learning for Multi-View Clustering. *IEEE Transactions on Pattern Analysis and Machine Intelligence* 45, 4 (2023), 5187–5202.
- [14] Yuan Xie, Shuhang Gu, Yan Liu, Wangmeng Zuo, Wensheng Zhang, and Lei Zhang. 2016. Weighted Schatten  $p$ -norm minimization for image denoising and background subtraction. *IEEE transactions on image processing* 25, 10 (2016), 4842–4857.
- [15] Yuan Xie, Dacheng Tao, Wensheng Zhang, Yan Liu, Lei Zhang, and Yanyun Qu. 2018. On unifying multi-view self-representations for clustering by tensor

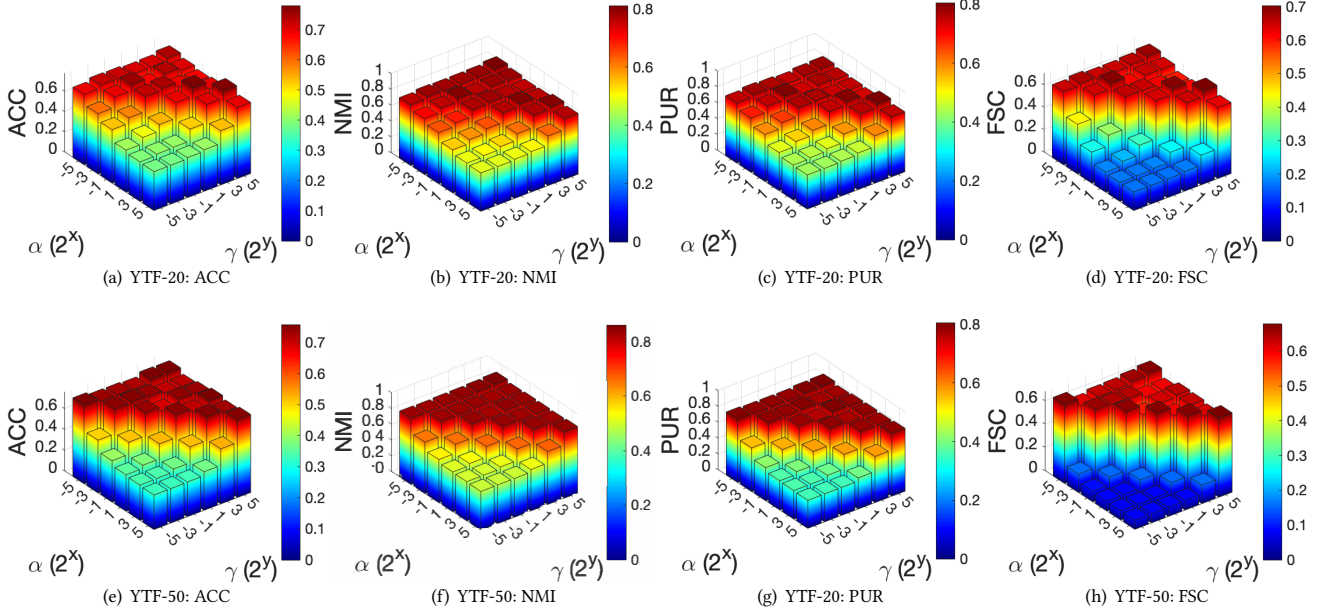

Figure 1: The parameter settings ( $\alpha$  and  $\gamma$ ) on the large-scale datasets, i.e., YTF50 and YTF-20.

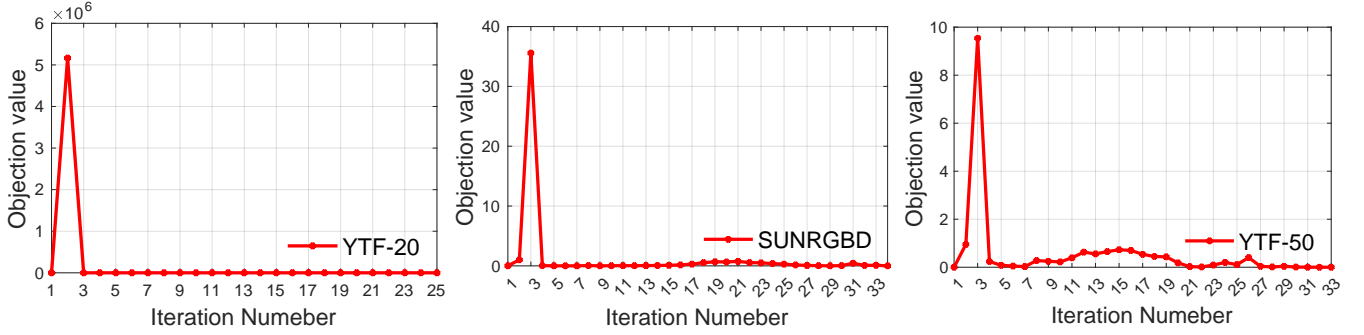

Figure 2: The losses on the YTF-50, YTF-20, and SUNRGBD datasets.

- multi-rank minimization. *International Journal of Computer Vision* 126, 11 (2018), 1157–1179.
- [16] Ben Yang, Xuetao Zhang, Feiping Nie, Fei Wang, Weizhong Yu, and Rong Wang. 2020. Fast multi-view clustering via nonnegative and orthogonal factorization. *IEEE Transactions on Image Processing* 30 (2020), 2575–2586.
- [17] Zheng Zhang, Li Liu, Fumin Shen, Heng Tao Shen, and Ling Shao. 2018. Binary multi-view clustering. *IEEE transactions on pattern analysis and machine intelligence* 41, 7 (2018), 1774–1782.
- [18] Wangmeng Zuo, Deyu Meng, Lei Zhang, Xiangchu Feng, and David Zhang. 2013. A generalized iterated shrinkage algorithm for non-convex sparse coding. In *Proceedings of the IEEE international conference on computer vision*. 217–224.
